# Supplementary material for: Specific Myosins Control Actin Organization, Cell Morphology, and Migration in Prostate Cancer Cells
Source: PubMed Central journal article supplement — Cell Rep. 2015 Dec 6;13(10):2118–25. doi: 10.1016/j.celrep.2015.11.012 (PMC4688110; doi:10.1016/j.celrep.2015.11.012), 2015-12-06
Supplement: mmc1.pdf [file mmc1.pdf]

Cell Reports

Supplemental Information

**Specific Myosins Control Actin Organization,  
Cell Morphology, and Migration  
in Prostate Cancer Cells**

Katarzyna A. Makowska, Ruth E. Hughes, Kathryn J. White, Claire M. Wells, and  
Michelle Peckham

**Table S1. Myosin isoforms detected by rt-PCR in prostate cell lines: LNCaP, PC-3, DU145, 1535 NP and 1535 CT (see Experimental Procedures)**

The table shows the myosin isoforms tested for expression by rt-PCR (see Experimental Procedures). The myosin isoforms MYO1A, MYO1F, MYO1G, MYO1H, NM2B, MYO3B, MYO15A, MYO15B, and MYO18B were tested, but not detected by rt-PCR (and are thus not listed in the table below). Isoforms MYO3A, MYO5A and MYO7A were only detected in DU-145 cells (+). 12 isoforms were detected in all 5 cell lines as shown in the table (+).

| <b>Myosin</b> | <b>LNCaP</b> | <b>PC-3</b> | <b>DU-145</b> | <b>1535 NP</b> | <b>1535 CT</b> |
|---------------|--------------|-------------|---------------|----------------|----------------|
| MYO1B         | +            | +           | +             | +              | +              |
| MYO1C         | +            | +           | +             | +              | +              |
| MYO1D         | +            | +           | +             | +              | +              |
| MYO1E         | +            | +           | +             | +              | +              |
| NM2A          | +            | +           | +             | +              | +              |
| MYO3A         | -            | -           | +             | -              | -              |
| MYO5A         | -            | -           | +             | -              | -              |
| MYO5B         | -            | -           | -             | +              | +              |
| MYO5C         | +            | +           | +             | +              | +              |
| MYO6          | +            | +           | +             | +              | +              |
| MYO7A         | -            | -           | +             | -              | -              |
| MYO9A         | +            | +           | +             | +              | +              |
| MYO9B         | +            | +           | +             | +              | +              |
| MYO10         | +            | +           | +             | +              | +              |
| MYO16         | -            | +           | -             | +              | +              |
| MYO18A        | +            | +           | +             | +              | +              |
| MYO19         | +            | +           | +             | +              | +              |

**Table S2. Sequences of primers used for PCR reactions (See Experimental Procedures).**

| <b>MYOSIN</b>              | <b>FORWARD (5' → 3')</b> | <b>REVERSE (5' → 3')</b> |
|----------------------------|--------------------------|--------------------------|
| <b>MYO1A</b>               | GGCAGATTTTCATCTACAAGAGCA | GTTTGTGGATGGCAAATTGTT    |
| <b>MYO1B</b>               | GGGCTTACTGGCTTGGATCT     | ACAGCAACTGCATGCTTACG     |
| <b>MYO1C</b>               | CTCATCACCAAGGCCAAGA      | CCTTTATCACCGAGAATTCAGC   |
| <b>MYO1D</b>               | CCCTGCAGACGATTTTCAATA    | TGCAACCTTTGCCCTGAC       |
| <b>MYO1E</b>               | CAAGACCGTCCGGAACAA       | CCACCTGGACTGAACTGGAT     |
| <b>MYO1F</b>               | AGACTGTGCGCAACAACAA      | CGGCTGAACTGGATCTCAA      |
| <b>MYO1G</b>               | CTTCCACGCCTTCTACCAAT     | TCTCCAAGTGCAGTTCATGC     |
| <b>MYO1H</b>               | ATAGCCCGTGACAGACTGCT     | GGAGCGTTCTGGCATTTC       |
| <b>NM2A</b>                | TGGAGGACCAGAACTGCAA      | GGTTGGTGGTGAAGTCAAGTA    |
| <b>NM2B</b>                | ATGAACCAGAAACGGGAGGT     | AAGGACTCCAAGAGGGGTGT     |
| <b>MYO3A</b>               | GAAAAATTAATCAACCTGGCAAA  | TGGTTGTCTCTCTGGCATGA     |
| <b>MYO3B</b>               | TGTCTTCTCGGATATGCCATC    | TGCAAGACCATTTTCTGAACC    |
| <b>MYO5A</b>               | GCGTCGGAGCTCTACACAA      | TTGAGCAGCTCTGCTGACTT     |
| <b>MYO5B</b>               | CCTACCAAGGCCTAAAGCAAG    | CCTCCTCCTCATGCTCCA       |
| <b>MYO5C</b>               | AAAGACCTTCACGCTTCTGG     | GCGGTGATCTGCACATTG       |
| <b>MYO6</b>                | CTCCAGCTTCACCCGTACA      | CGATCTCCTGTTTCCACTATCC   |
| <b>MYO7A</b>               | GCTGGCAGGTCACTGAGAGT     | AATCACCATGGTCCCAAGTC     |
| <b>MYO7B</b>               | CAAGCACGCAGGGAAGTC       | TTTGGCTCCGTAGTTTGCTC     |
| <b>MYO9A</b>               | CAGATAACAAAGAAACCCCTCAG  | TCCACCGTGAAGCAATCC       |
| <b>MYO9B</b>               | CAACCAGCACATCTTCAAGC     | TGTTGTGCCACGTGATCC       |
| <b>MYO10</b>               | AGGACTTTCCACCTGATTGC     | CGTGGACCTGACTCAGCA       |
| <b>MYO15A</b>              | ATGAACCAGAAACGGGAGGT     | AAGGACTCCAAGAGGGGTGT     |
| <b>MYO15B</b>              | GATGCCTACGGCTTTGAGG      | GGCTGGAGAAGAGCTGTAGG     |
| <b>MYO16</b>               | CCTGCGTGAGAAGAAGGAAC     | CACTTTTTCGGACTCCCATCT    |
| <b>MYO18A</b>              | GGACATGGTGACAAAGTATCAGAA | TTTGACAACCAGGACTTGACC    |
| <b>MYO18B</b>              | AGCATGGCCATCTCATCAC      | TCTTGTCTCTTCCCGAATC      |
| <b>MYO19</b>               | CGCAGACCTTTCTCCAAGAG     | GATATGGATGGTCTCCACGAG    |
| <b>HOUSEKEEPING GENES:</b> |                          |                          |
| <b>GAPDH</b>               | GAAGGTGAAGGTCGGAGTC      | GAAGATGGTGATGGGATTTC     |
| <b>18S rRNA</b>            | GTAACCCGTTGAACCCATT      | CCATCCAATCGGTAGTAGCG     |

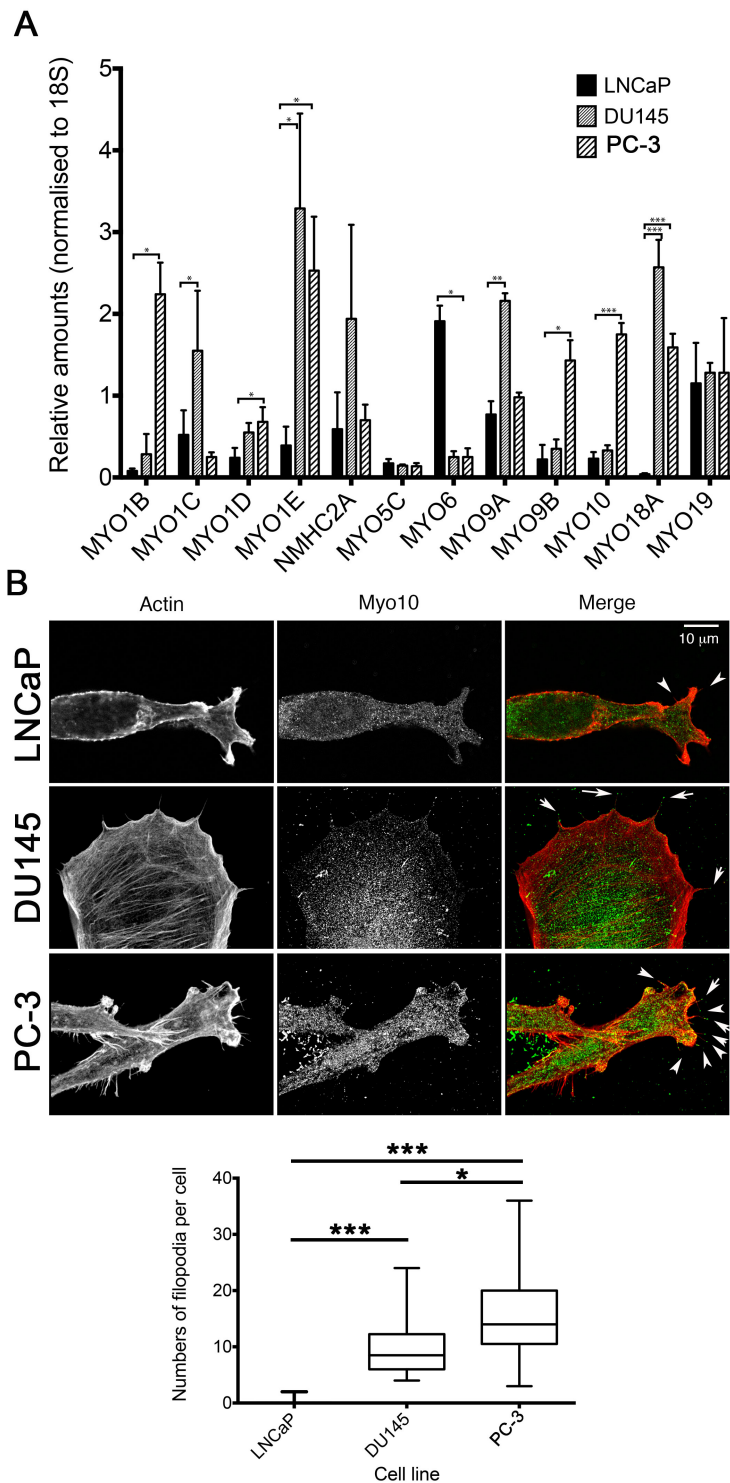

**Figure S1: qPCR and Myo10 immunostaining data for LNCaP, DU145 and PC-3 (see Figure 1 and Experimental Procedures).** (A) qPCR data as shown in Figure 1 (with the addition of the data for DU145). (B) shows representative images of filopodia in the three different cell lines, together with quantification of the numbers of filopodia per cell for each cell type. Data for PC-3 and LNCaP as shown in Figure 2C (Main text), with the addition of values here for DU145 cells. The graph shows box and whisker plots, with the whiskers showing minimum and maximum data points. We found low, medium and high numbers of filopodia for LNCaP, DU145 and PC-3 cells, respectively. Significant differences are indicated by the bars and asterisks, with \* as  $p < 0.05$ , \*\*\* as  $p < 0.001$ .
